# Supplementary material for: Selective Recruitment of an E2∼Ubiquitin Complex by an E3 Ubiquitin Ligase
Source: PubMed Central journal article supplement — J Biol Chem. 2012 Mar 20;287(21):17374–85. doi: 10.1074/jbc.M112.353748 (PMC3366790; doi:10.1074/jbc.m112.353748), 2012-03-20
Supplement: supp_M112.353748_jbc.M112.353748-1.pdf [file supp_M112.353748_jbc.M112.353748-1.pdf]

## Supplementary Figure 1

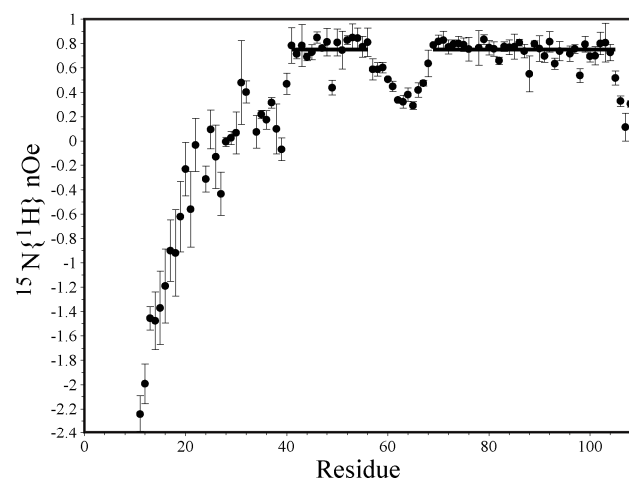

**Supplementary Figure 1.**  $^{15}\text{N}\{^1\text{H}\}$  heteronuclear NOE values for sRbx1<sup>12-108</sup>. The average  $^{15}\text{N}\{^1\text{H}\}$  NOE determined from triplicate measurements at 600 MHz are shown as filled circles with error bars ( $\pm$  standard deviation). The solid lines represent the average NOE (0.75) determined for the folded regions of Rbx1/ROC1 (N40-C56, T69-K105). Residues G18-V39 show near zero or negative NOE values showing that the *N*-terminus of Rbx1/ROC1 is flexible and disordered.

## Supplementary Figure 2

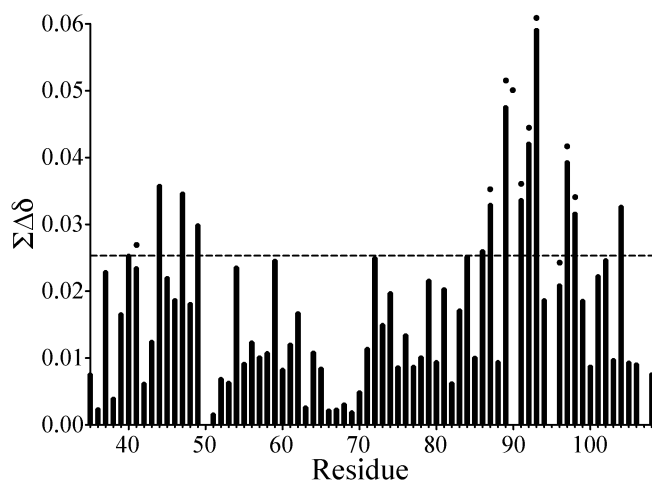

**Supplementary Figure 2.** Histogram of amide chemical shift perturbations for <sup>15</sup>N-labeled sRbx1<sup>12-108</sup> associated to CDC34-Ub<sup>Cys</sup> complex. The amide chemical shift changes for each residue in sRbx1<sup>12-108</sup> were determined using the spectra shown in Figure 3B and the equation  $\Sigma\Delta\delta = |(\Delta\delta^1\text{H})| + |(0.2)*(\Delta\delta^{15}\text{N})|$ . The dotted line indicates the threshold used to determine residues that experience significant chemical shift changes (0.026 ppm). Residues that also demonstrated intensity changes or line broadening are highlighted (•).
